# Supplementary material
Source: publisher figshare collection journal article supplement (https://springernature.figshare.com/ndownloader/files/27609248)

# Biological process level 2 GO annotation of 1401 EST library

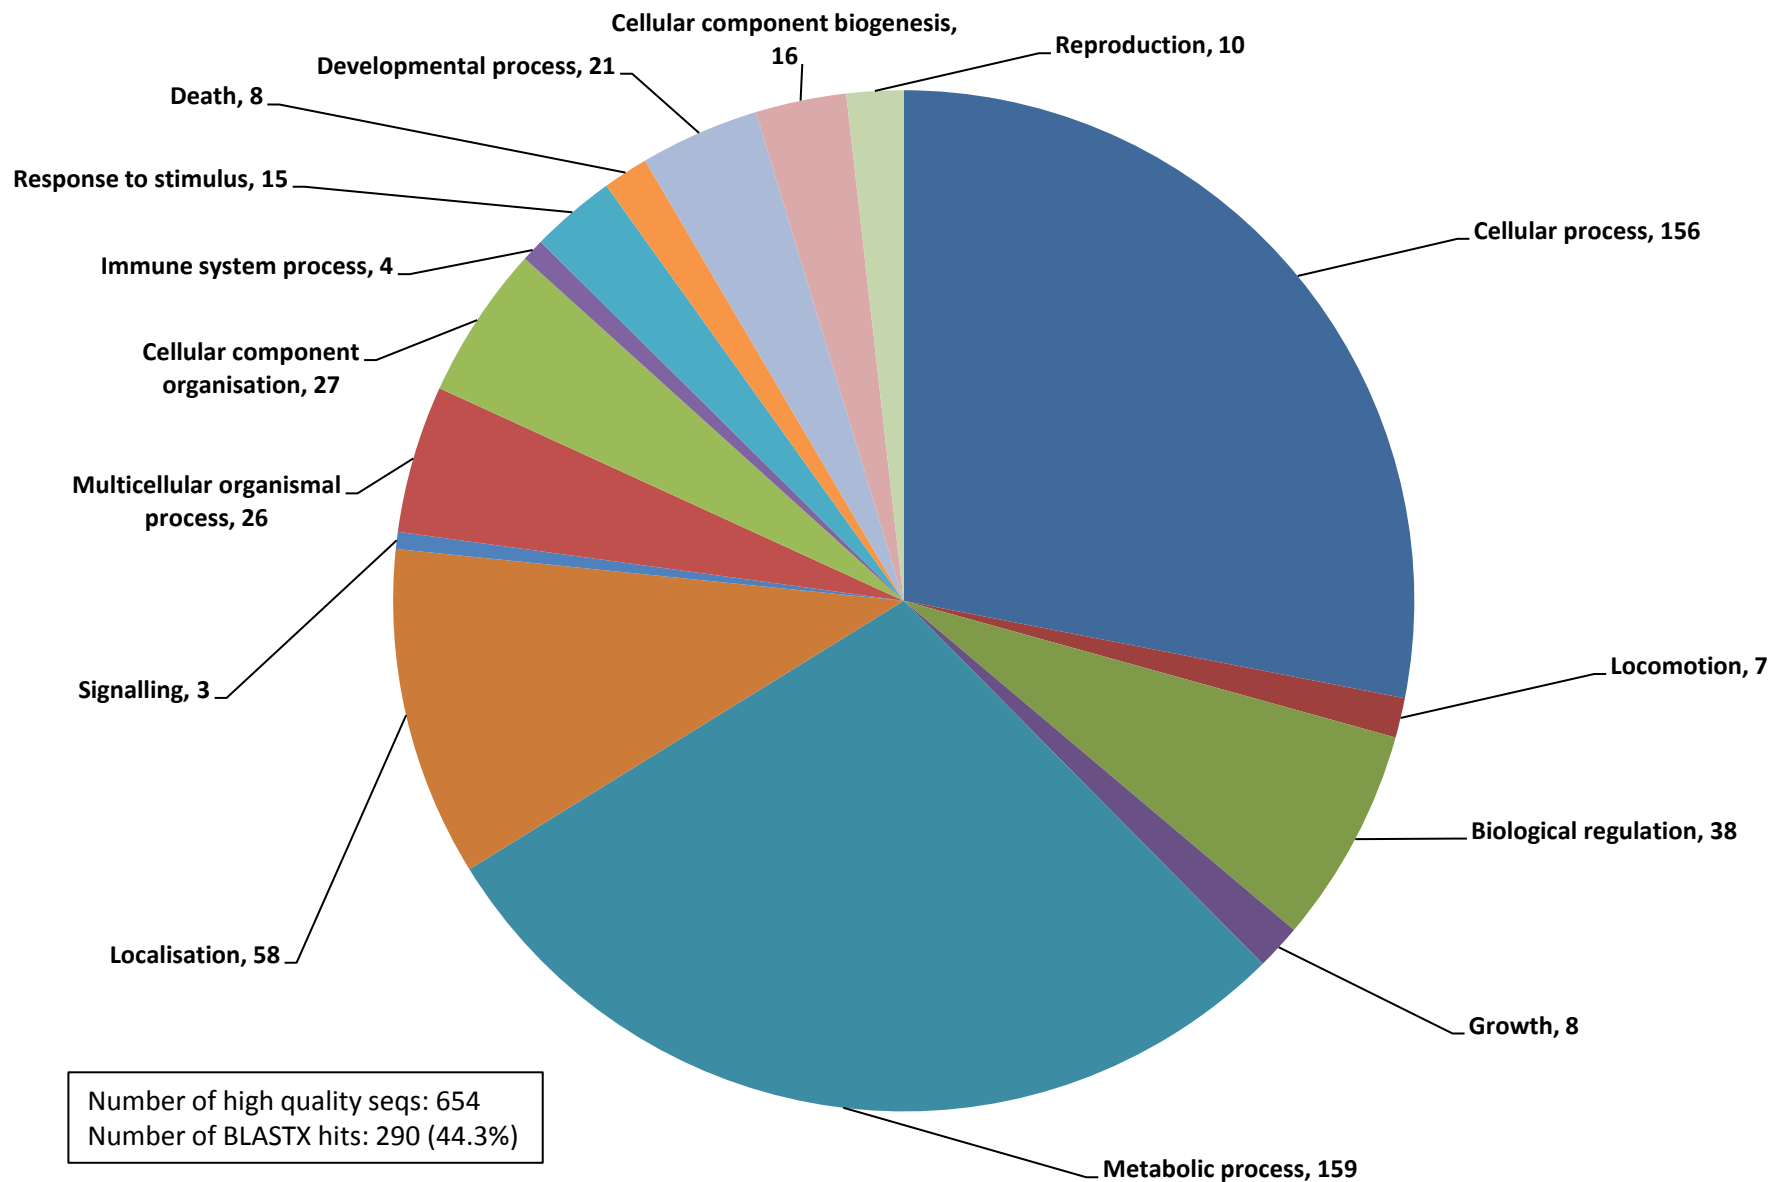

Supplement: Supplementary file [file 27609248]
